# Supplementary material
Source: Research Square preprint supplement (doi:10.21203/rs.3.rs-9552933/v1)
Supplement: Supplementary file 1 [file 9215f463ece6b6d775cd718e.xlsx]

## Sheet: List1
Table S1. Numbers of mice examined during respective phases of the study; Mmd = Mus musculus domesticus, Mmm = M. m. musculus, m = males, f = females.
		Initial phase: animals
			MUP		Testosterone		Corticosterone
		Ssp	Singly housed	Social	Singly housed	Social	Singly housed	Social
		Mmd	6m+6f	5m+6f	6m	5m	6m+6f	5m+6f
		Mmm	6m+6f	6m+6f	6m	6m	6m+6f	6m+6f
		Initial phase: samples
			MUP		Testosterone		Corticosterone
		Ssp	Singly Housed	Social	Singly Housed	Social	Singly Housed	Social
		Mmd	12m+18f	5m+6f	12m	5m	12m+18f	5m+6f
		Mmm	11m+18f	6m+6f	11m	6m	11m+18f	6m+6f
		Social phase: animals and samples
			MUP		Testosterone		Corticosterone
		Ssp	Animals	Samples	Animals	Samples	Animals	Samples
		Mmd	32m+19f	85m+57f	32m	87m	32m+19f	87m+62f
		Mmm	26m+23f	87m+91f	26m	86m	25m+24f	87m+95f
		Isolation phase: males (samples equal animals)
			MUP		Testosterone		Corticosterone
		Ssp	Social	Singly housed	Social	Singly housed	Social	Singly housed
		Mmd	40	36	42	42	43	42
		Mmm	33	31	32	34	34	35
		Isolation phase: males with paired samplings
		Ssp	MUP	Testosterone	Corticosterone
		Mmd	35	42	42
		Mmm	31	32	33
